# Event-Related Phase Synchronization Propagates Rapidly across Human Ventral Visual Cortex

Oscar Woolnough<sup>1,2</sup>, Kiefer J. Forseth<sup>1,2</sup>, Patrick S. Rollo<sup>1,2</sup>, Zachary J. Roccaforte<sup>1,2</sup>, Nitin Tandon<sup>1,2,3,\*</sup>

<sup>1</sup> Vivian L. Smith Department of Neurosurgery, McGovern Medical School at UT Health Houston, Houston, TX, 77030, United States of America

<sup>2</sup> Texas Institute for Restorative Neurotechnologies, University of Texas Health Science Center at Houston, Houston, TX, 77030, United States of America

<sup>3</sup> Memorial Hermann Hospital, Texas Medical Center, Houston, TX, 77030, United States of America

\* Correspondence: [nitin.tandon@uth.tmc.edu](mailto:nitin.tandon@uth.tmc.edu)

## 1 Abstract

2 Visual inputs to early visual cortex integrate with semantic, linguistic and memory inputs in higher  
3 visual cortex, in a manner that is rapid and accurate, and enables complex computations such as face  
4 recognition and word reading. This implies the existence of fundamental organizational principles  
5 that enable such efficiency. To elaborate on this, we performed intracranial recordings in 82  
6 individuals while they performed tasks of varying visual and cognitive complexity. We discovered that  
7 visual inputs induce highly organized posterior-to-anterior propagating patterns of phase modulation  
8 across the ventral occipitotemporal cortex. At individual electrodes there was a stereotyped  
9 temporal pattern of phase progression following both stimulus onset and offset, consistent across  
10 trials and tasks. The phase of low frequency activity in anterior regions was predicted by the prior  
11 phase in posterior cortical regions. This spatiotemporal propagation of phase likely serves as a feed-  
12 forward organizational influence enabling the integration of information across the ventral visual  
13 stream. This phase modulation manifests as the early components of the event related potential;  
14 one of the most commonly used measures in human electrophysiology. These findings illuminate  
15 fundamental organizational principles of the higher order visual system that enable the rapid  
16 recognition and characterization of a variety of inputs.

## 17 **Introduction**

18 Ventral occipitotemporal cortex is organized in a cortical hierarchy from early visual regions (e.g.  
19 calcarine cortex) to associative areas (e.g. fusiform cortex) (Felleman and Van Essen, 1991; Morán et  
20 al., 1987), that constitutes the ventral visual stream (Mishkin et al., 1983). This processing pathway  
21 is crucial for the integration of visual processing with language and memory (Forseth et al., 2018;  
22 Ghuman et al., 2014; Hirshorn et al., 2016; Kadipasaoglu et al., 2016; Tang et al., 2014; Woolnough  
23 et al., 2021b), but it is unclear how the propagation of information between functional components  
24 of the human ventral visual pathway is coordinated.

25 Recently, spatial propagation of information has been characterized, in both humans and non-human  
26 primates, as travelling waves of cortical activation. These occur at both the macro and micro scale  
27 and represent the structured propagation of information across the cortical surface in response to  
28 inputs (Lozano-Soldevilla and VanRullen, 2019; Muller et al., 2018, 2014; Sato et al., 2012) or may  
29 occur spontaneously (Bahramisharif et al., 2013; Davis et al., 2020; Halgren et al., 2019; Muller et al.,  
30 2016; Zhang et al., 2018). In the ventral visual stream of macaques this manifests as a rapid  
31 feedforward sweep of activation following visual stimulation (Lamme and Roelfsema, 2000). This  
32 spatiotemporal organization, manifest as a travelling wave indexes synchronized long-range cortico-  
33 cortical connections, enabling the integration of information across multiple cortical areas (Sato et  
34 al., 2012; Zhang et al., 2018) and perhaps also facilitates predictive coding (Alamia and VanRullen,  
35 2019; Arnal and Giraud, 2012). Such travelling waves have commonly been characterized as a spatial  
36 propagation of phase. Sensory inputs result in the modulation of phase of ongoing oscillations  
37 (Howard and Poeppel, 2012; Lakatos et al., 2008, 2005; Luo et al., 2010) and the timing of inputs  
38 relative to the phase of ongoing oscillations impacts perception (Bonnefond and Jensen, 2012; Davis  
39 et al., 2020; Dugué et al., 2015; Forseth et al., 2020; Mercier et al., 2015). Based on this, we  
40 hypothesize there is a stimulus-evoked modulation of phase that spatiotemporally propagates  
41 through the human ventral visual pathway.

42 To probe the spread of visually-evoked phase modulation across the ventral visual stream, we utilized  
43 high spatiotemporal resolution intracranial recordings in a large human cohort (82 patients), with  
44 almost ubiquitous coverage of the ventral visual stream (1,929 electrodes), who performed a  
45 language task with relatively low visual complexity stimulus (word reading) or a memory task with a  
46 high complexity visual stimulus (face naming).

## 47 Results

48 82 patients semi-chronically implanted with subdural grid electrodes (SDEs; 14 patients) or  
49 stereotactically placed depth electrodes (sEEGs; 68 patients) for the localization of intractable  
50 epilepsy performed word reading (n = 40) and face naming (n = 57) tasks (Figure 1A,B). Phase  
51 modulation was quantified by computing the inter-trial phase coherence (ITC; Figure 1E,F) of the  
52 broadband low frequency signal (2-30 Hz) at each electrode, across multiple trials.

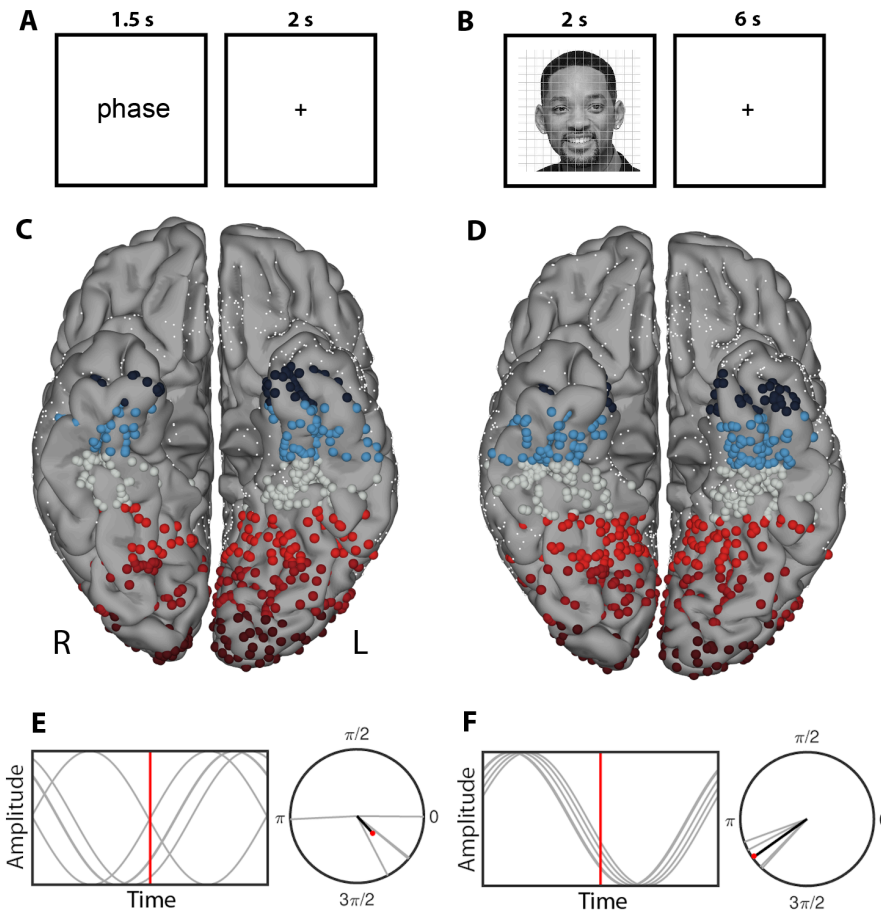

53

54 **Figure 1: Tasks, Patients and ITC Analysis.** (A,B) Schematic representation of the words (A) and faces  
55 (B) tasks. (C,D) Individual electrode locations, within the ventral ROI, for patients reading words (C;  
56 1,059 electrodes, 40 patients) and recognizing faces (D; 1,246 electrodes, 57 patients) plotted on a  
57 standardized N27 brain. Electrode colors represent the relative locations with individual electrodes  
58 clustered into 20 mm bins along the y-axis. Smaller white spheres represent electrodes outside the  
59 ventral ROI. (E,F) Schematic representation with artificial data to illustrate low (E; ITC = 0.25) and high  
60 (F; ITC = 0.95) phase alignment along with a representation of the vector mean.

61

62 **Phase Modulation induced by Words and Faces**

63 Data from two representative patients, with broad coverage of ventral occipitotemporal cortex, are  
64 shown in Figure 2. In both instances, increases in inter-trial phase coherence were seen in electrodes  
65 from occipital pole to mid-fusiform cortex, for both tasks. Within each patient we also observed  
66 highly comparable patterns of ITC across both tasks. As expected, during the period preceding the  
67 onset of visual stimulation, the trial-by-trial distribution of phases at any given time was reasonably  
68 uniform. However, following presentation of a visual stimulus, they tended to a coherent center  
69 frequency (Figure 2C,D). This phase coherence persisted for approximately 2 cycles ( $4\pi$  rads,  $\sim 300$ ms)  
70 (Figure 2F,H). The temporal progression of the coherent center frequency was highly similar across  
71 both tasks.



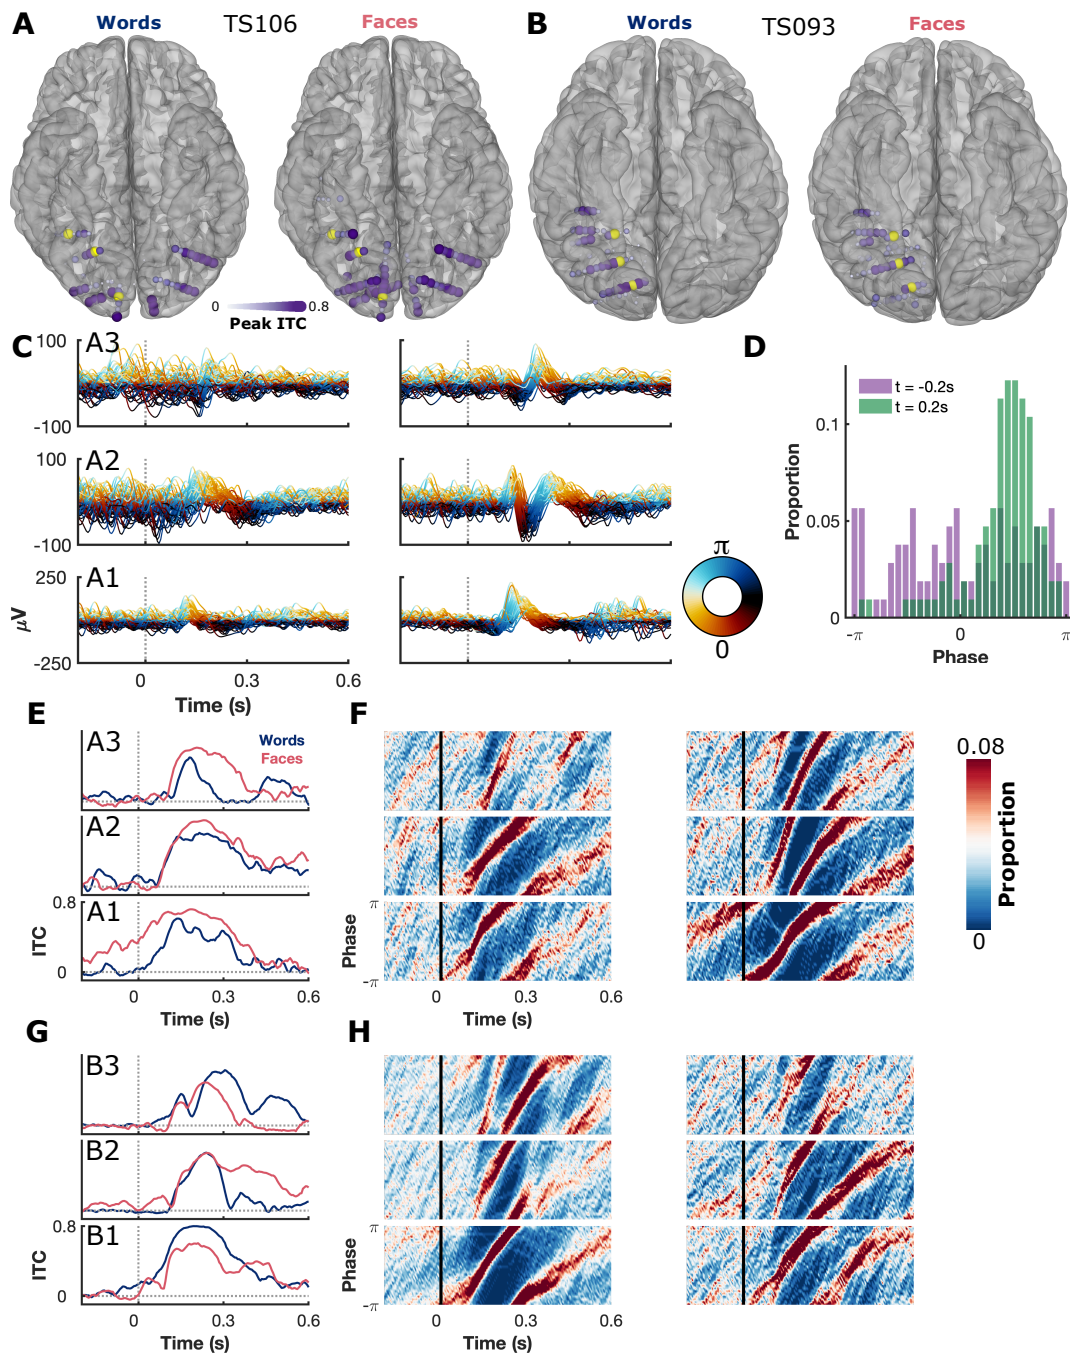

72

73 **Figure 2: Spatial Propagation of Phase Coherence in Exemplar Patients.** (A,B) ITC distributions, in  
74 native patient space, for TS106 (A) and TS093 (B). Results are shown for words (left) and faces (right).  
75 (C) Broadband low frequency (2-30 Hz) signals of 60 trials from TS106 from the words (left) and faces  
76 (right) tasks. Traces colored based on instantaneous generalized phase. (D) Phase distribution for a  
77 representative electrode at two time points during the faces task. (E-H) ITC (E,G) and phase  
78 distributions (F,H), with words (left) and faces (right) shown for three electrodes each from TS106  
79 (E,F) and TS097 (G,H). Electrodes are highlighted in yellow in the brain plots and electrode numbers  
80 increase from posterior to anterior.

81 To evaluate the consistency of these effects across the population ( $n = 82$  patients), we represented  
82 ITC amplitudes on a group normalized cortical surface from occipital pole to anterior fusiform cortex  
83 (Figure 3A,B). High ITC ( $>0.5$ ) values were noted in associative cortex as far anterior as mid-fusiform.  
84 Stimulus presentation resulted in two distinct peaks of the ITC measure – a higher one around  
85 stimulus onset and a smaller one at offset. Differences in offset time between the two tasks, based  
86 on experimental design, confirmed that this was an offset response (Figure 3D,E). Results calculated  
87 using the raw signal (0.3-100Hz) showed highly correlated peak ITC with the broadband low  
88 frequency (2-30Hz) signal (Spearman correlation; words,  $r(1,059) = 0.86$ ,  $p < 0.001$ ; faces,  $r(1,246) =$   
89  $0.82$ ,  $p < 0.001$ ; Supplementary Figure 1E,F) but with the raw signal displaying a longer duration of  
90 significant ITC (Supplementary Figure 1G,H).

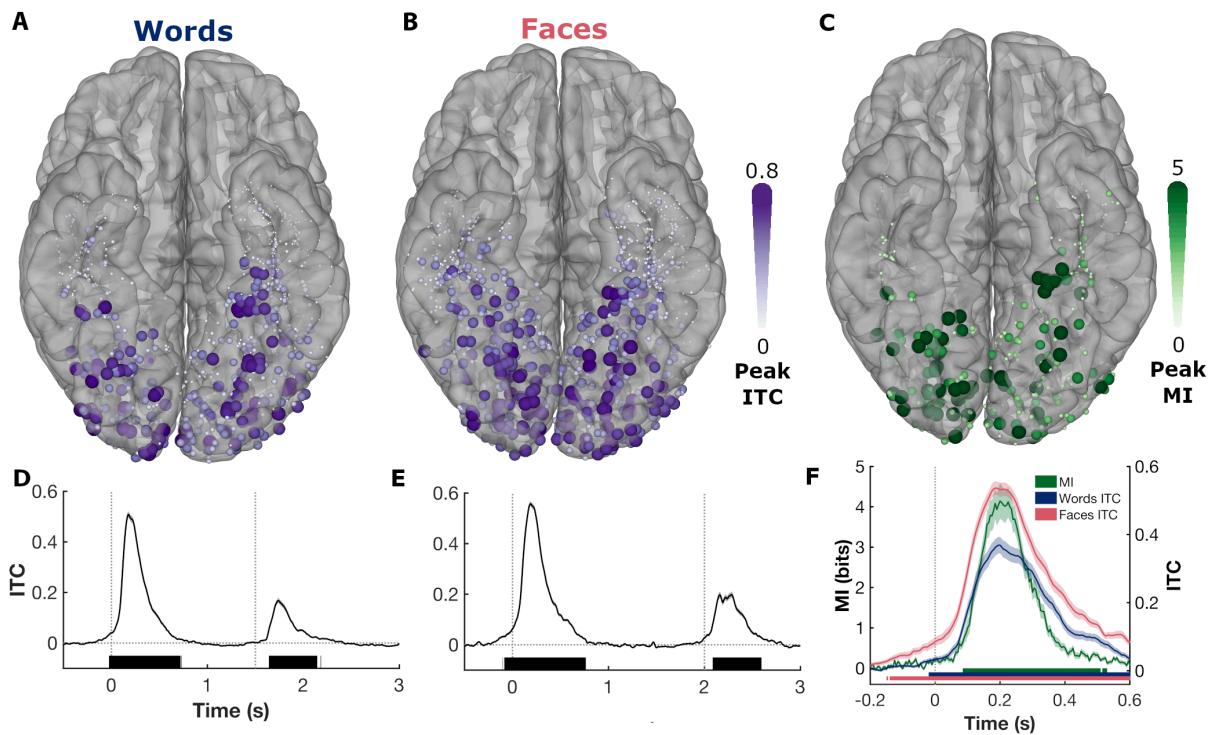

91

92 **Figure 3: Population Phase Coherence.** (A,B) Peak ITC at individual electrodes for words (A; 1,059  
93 electrodes) and faces (B; 1,246 electrodes) tasks represented on a standardized surface. (C) Peak  
94 mutual information (MI) between the phase distributions in response to word or face presentation  
95 in patients who performed both tasks (354 electrodes, 15 patients). (D,E) Time course of ITC (mean  
96  $\pm$  SE) at electrodes with the top 20% peak amplitude ITC responses to words (D) and faces (E). Vertical  
97 lines denote the onset and offset times of each stimulus. Colored bars represent regions of significant  
98 increase over baseline ( $q < 0.001$ ). (F) MI and ITC for the electrodes with the top 20% highest peak MI.  
99 See also Supplementary Figures 1, 2.

100 The results thus far demonstrate that within each task there is phase coherence between trials and  
101 the magnitude and duration of this coherence is reasonably conserved across different tasks. But,  
102 how consistent is this pattern of evoked phase across tasks? To quantify this, we measured mutual  
103 information (MI) in patients who performed both tasks ( $n = 15$ ). We observed an increase in MI  
104 following the visual onsets, representing an increase in the similarity of phase distributions between  
105 tasks. This inter-task coherence peaked at  $\sim 200$ ms following visual onset, highly concordant with the  
106 within-trial ITC (Figure 3F). 9 out of the 15 patients had at least one electrode peaking at  $>5$  bits  
107 (48/354 electrodes; Supplementary Figure 2A). Peak MI correlated well with peak ITC, measured  
108 across both tasks (Spearman correlation,  $r(354) = 0.76$ ,  $p < 0.001$ ; Supplementary Figure 2C).

109 Next, we sought to characterize the spatiotemporal properties of this response, by dividing the  
110 ventral cortical surface into 20 mm bins along the y axis of the normalized surface in Talairach space,  
111 and used this to compare grouped ITC profiles from each bin (Figure 4). We noted a pronounced  
112 posterior-to-anterior gradient of both amplitude and onset latency of ITC with the largest responses  
113 in early visual cortex and progressive diminution anteriorly in both hemispheres, for both tasks. A 4D,  
114 cortical surface-based representation of the propagation of this phase coherence across the cortical  
115 surface revealed a posterior-to-anterior wave, highly conserved across both tasks (Movie 1).

116

117 **Movie 1: Spread of Phase Coherence across the Cortical Surface.** Population-level, surface-based  
118 representation of ITC in response to words (left) and faces (right).

119

120 To quantify this posterior-to-anterior latency gradient, we calculated the time point at which the first  
121 derivative of the ITC first significantly deviated from baseline at each electrode (Figure 4E). In both  
122 tasks there was a clear gradient from calcarine to anterior fusiform. Onset latency showed a  
123 significant association with position in the anteroposterior axis for both words ( $t(781) = 12.5$ ,  $\beta = 1.0$   
124  $\pm 0.08$ ,  $p < 0.001$ ,  $r^2 = 0.30$ ) and faces ( $t(779) = 9.7$ ,  $\beta = 1.3 \pm 0.13$ ,  $p < 0.001$ ,  $r^2 = 0.21$ ) tasks. This  
125 reflects a posterior-to-anterior progression of the timing of ITC across the cortical surface from early  
126 sensory cortex to associative regions and a consistent propagation rate of approximately 0.8-1 m/s  
127 in Euclidean space.

128 To further investigate the spatiotemporal consistency of this effect between tasks, we analyzed just  
129 the subset of patients who performed both tasks ( $n = 15$ ). There was no significant difference in ITC

130 onset latency between the two tasks ( $t(462) = -1.6$ ,  $\beta = -0.03 \pm 0.02$ ,  $p = 0.12$ ) or any significant effect  
 131 of task on the propagation rate ( $t(462) = -1.3$ ,  $\beta = -0.35 \pm 0.27$ ,  $p = 0.20$ ).

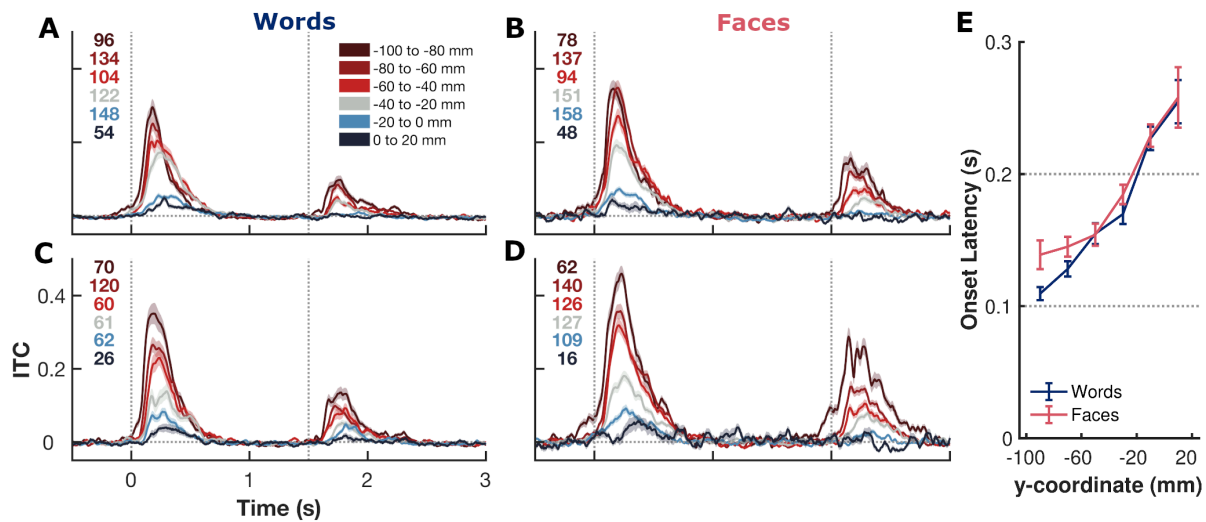

132

133 **Figure 4: ITC – Positional Analysis.** (A-D) ITC in response to words (A,C) or faces (B,D) as a function of  
 134 anteroposterior position in the left (A,B) and right (C,D) hemisphere. Presented as mean  $\pm$  SE.  
 135 Number of electrodes in each ROI shown. Vertical lines denote stimulus onset and offset times. (E)  
 136 ITC demonstrates a posterior-to-anterior gradient of first onset latency (ITC first-derivative  $>3.5SD$   
 137 deviation from baseline).

138

139 To further characterize this posterior-to-anterior spread and to identify the degree of propagation of  
 140 phase information across the cortical surface, we calculated the lagged phase locking value (PLV)  
 141 between pairs of electrodes. By lagging the time courses of phase progression between pairs of  
 142 electrodes we sought to determine to what degree the future phase of anterior sites could be  
 143 predicted by the current phase of posterior sites (Figure 5A). This analysis demonstrated a strong bias  
 144 toward a posterior-to-anterior spread of phase information, with the phase of anterior sites being  
 145 driven by more posterior regions (Figure 5B, Supplementary Figure 3).

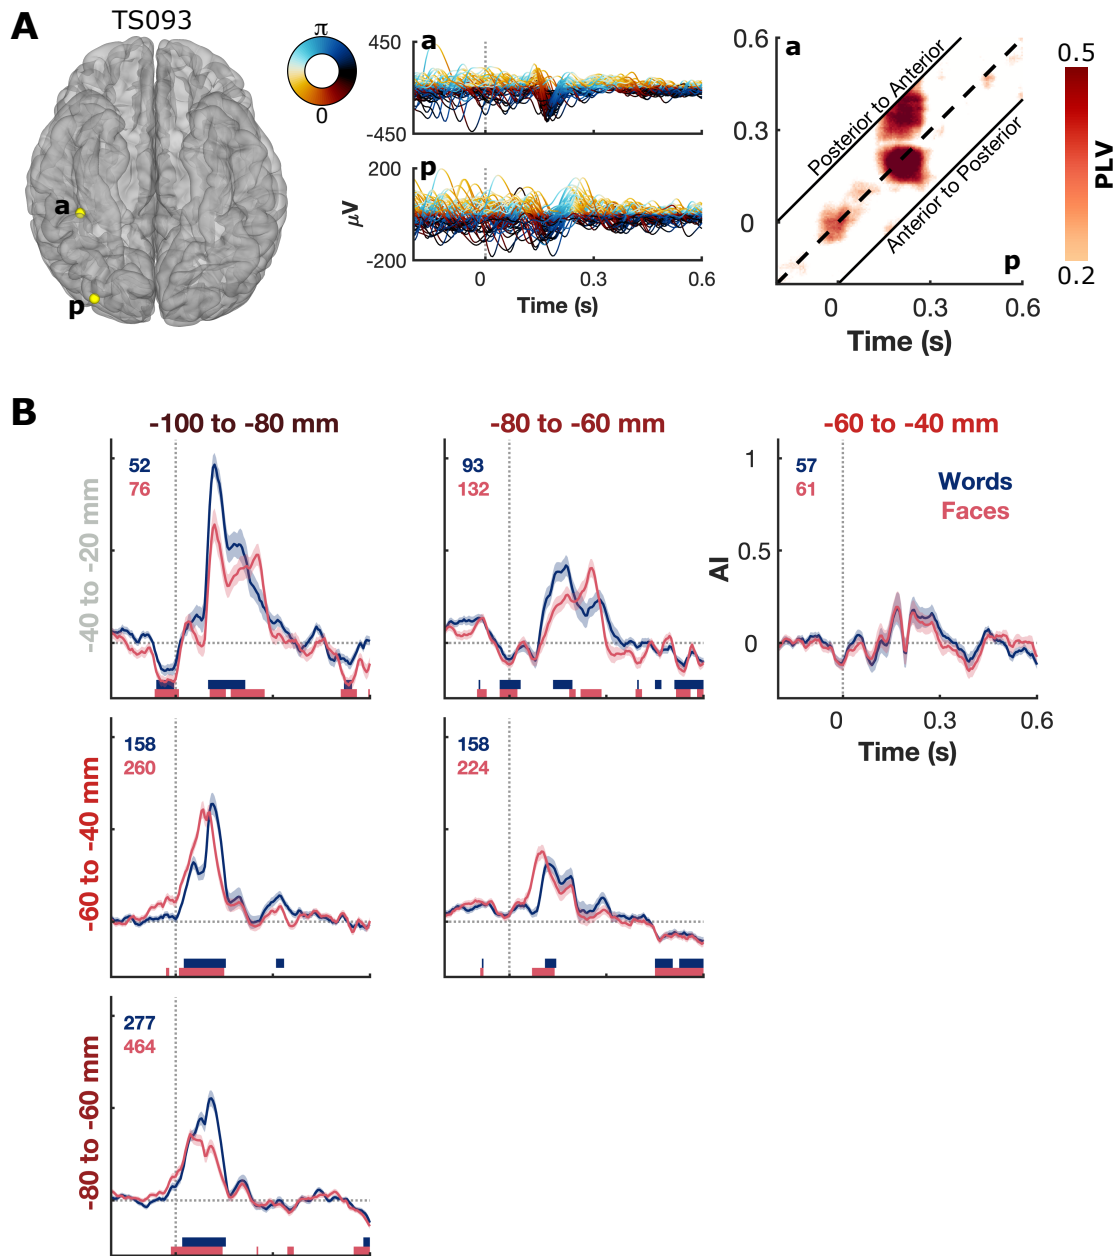

146

147 **Figure 5: Propagation of Phase.** (A) Exemplar electrode pair demonstrating the lagged phase locking  
 148 value (PLV) analysis. PLV was calculated between the instantaneous phase of the posterior electrode  
 149 (p) and the time lagged phase of the anterior electrode (a; -200 to 200 ms). Greater PLV above the  
 150 center diagonal (dashed line) represents a greater ability to predict future phase of the anterior  
 151 electrode based on the current phase of the posterior electrode. (B) Calculated asymmetry index (AI)  
 152 of PLV above and below the center diagonal for high ITC (>0.5) electrode pairs across ROIs. AI > 0  
 153 represents a bias toward posterior-to-anterior phase propagation. Colored bars represent regions of  
 154 significant difference from baseline ( $q < 0.001$ ). Number of electrode pairs in each ROI pair shown. See  
 155 also Supplementary Figure 3.



## 156 **Discussion**

157 We have identified a visually-induced, macroscale, spatiotemporal propagation of phase modulation  
158 from posterior-to-anterior in human ventral occipitotemporal cortex. Strong phase modulation is  
159 seen almost ubiquitously across ventral occipitotemporal cortex in both hemispheres; from occipital  
160 pole to anterior fusiform. Following a visual event each region within the visual pathway displays a  
161 predictable, stereotyped phase progression. These findings were highly repeatable across a diverse  
162 range of visual stimuli with varying task demands and attentional loads and in only partially  
163 overlapping patient populations. We observed an approximate Euclidean propagation velocity of 0.8-  
164 1.0 m/s. This is comparable to the conduction velocities of unmyelinated horizontal projection axons  
165 in macaques (0.1-0.6 m/s) (Davis et al., 2020) and is much slower than would be expected from  
166 monosynaptic white matter transmission (>15 m/s) (Ferraina et al., 2002). This further implies that  
167 this phase propagation likely occurs via sequential cortico-cortical connections (Muller et al., 2014).

168 Previous work has shown the organization of spontaneous oscillations as large scale travelling waves  
169 (Bahramisharif et al., 2013; Muller et al., 2016; Zhang et al., 2018) and small scale travelling waves  
170 within early visual cortex (Muller et al., 2014; Sato et al., 2012). We expand on this work,  
171 characterizing a visually-evoked, macroscale phase propagation across the entire ventral visual  
172 pathway that likely indexes feedforward communication (Bastos et al., 2015), long-range cortico-  
173 cortical connections (Muller et al., 2014) and integration of information over broad cortical areas  
174 (Sato et al., 2012; Zhang et al., 2018).

175 A phase reset following visual input has been demonstrated in human (Mormann et al., 2005; Rizzuto  
176 et al., 2003; Tesche and Karhu, 2000) and macaque (Jutras et al., 2013) hippocampi. It is possible that  
177 this is also initiated as part of this sequence of ventral phase modulations. During visual exploration  
178 this hippocampal phase reset consistently occurs following saccadic eye movements (Jutras et al.,  
179 2013) suggesting that ventral phase modulation may occur following each saccade during naturalistic  
180 viewing.

181 Extracranial recordings of study phase modulation are an aggregate of many sources, limiting insight  
182 into underlying generators. Further, the relative inaccessibility of electrical fields generated by the  
183 ventral temporal surface (Goldenholz et al., 2009) has limited studies of visual phase modulation to  
184 early visual cortex. This has precluded insight into the spatiotemporal topography of visually-induced  
185 phase modulation in the human ventral visual pathway. Our results are supportive of the phase reset

186 model of event related potential (ERP) generation (Klimesch et al., 2007; Makeig et al., 2002; Sauseng  
187 et al., 2007; Yeung et al., 2004). According to the phase reset model, the reset of instantaneous phase  
188 of ongoing oscillations, tending toward a fixed value upon presentation of a stimulus, results in the  
189 ERP by creating a coherent superposition of phase components (Iemi et al., 2019). Simulations of the  
190 underlying generators of the ERP suggest that early components (<200 ms), corresponding to the  
191 time course of ITC seen here, primarily represent feed-forward influences, with later ERP  
192 components being influenced by top-down modulation (Garrido et al., 2007).

193

## 194 **Conclusion**

195 We demonstrate the existence of visually-induced macroscale posterior-to-anterior propagation of  
196 phase modulation across the human ventral occipitotemporal cortex. We propose this represents a  
197 feed-forward spread of information via horizontal cortico-cortical connections throughout the  
198 ventral visual pathway.

199

## 200 **Materials and Methods**

201 *Participants:* 82 patients (44 male, 18-60 years, 16 left-handed) undergoing implantation with  
202 intracranial electrodes for seizure localization of pharmaco-resistant epilepsy participated after  
203 giving written informed consent. Participants with significant additional neurological history (e.g.  
204 previous resections, MR imaging abnormalities such as malformations or hypoplasia) were excluded.  
205 All experimental procedures were reviewed and approved by the Committee for the Protection of  
206 Human Subjects (CPHS) of the University of Texas Health Science Center at Houston as Protocol  
207 Number HSC-MS-06-0385.

208 *Electrode Implantation and Data Recording:* Data were acquired using either subdural grid electrodes  
209 (SDEs; 14 patients) or stereotactically placed depth electrodes (sEEGs; 68 patients). SDEs were  
210 subdural platinum-iridium electrodes embedded in a silicone elastomer sheet (PMT Corporation; top-  
211 hat design; 3mm diameter cortical contact), surgically implanted via a craniotomy following  
212 previously described methods (Pieters et al., 2013; Tandon, 2012; Tong et al., 2020). sEEGs were  
213 implanted using a Robotic Surgical Assistant (ROSA; Medtech, Montpellier, France) (Rollo et al., 2020;  
214 Tandon et al., 2019). Each sEEG probe (PMT corporation, Chanhassen, Minnesota) is 0.8 mm in

215 diameter, with 8-16 electrode contacts, each contact being a 2mm long platinum-iridium cylinder  
216 separated from the adjacent contact by 1.5 - 2.43 mm. Each patient had 12-20 such probes  
217 implanted. Following surgical implantation, electrodes were localized by co-registration of pre-  
218 operative anatomical 3T MRI and post-operative CT scans in AFNI (Cox, 1996). Electrode positions  
219 were projected onto a cortical surface model generated in FreeSurfer (Dale et al., 1999), and  
220 displayed on the cortical surface model for visualization (Pieters et al., 2013). Intracranial data were  
221 collected during research experiments starting on the first day after electrode implantation for sEEGs  
222 and two days after implantation for SDEs. Data were digitized at 2 kHz using the NeuroPort recording  
223 system (Blackrock Microsystems, Salt Lake City, Utah), imported into Matlab, and visually inspected  
224 for line noise, artifacts and epileptic activity. Of a total of 11,164 electrodes, 3,919 electrodes with  
225 obvious line noise or localized in proximity to sites of seizure onset were excluded. Each electrode  
226 was re-referenced to the common average of the remaining channels. Trials contaminated by inter-  
227 ictal epileptic spikes were discarded.

228 Signal Analysis: An ROI encompassing the entire occipital lobe and the ventral temporal surface, but  
229 excluding parahippocampal and entorhinal regions, was then applied, restricting us to 1,929  
230 electrodes which form the basis of this work. These electrodes were grouped into sub-ROIs within 20  
231 mm intervals along the y-axis of Talairach space, from -100 mm to 20 mm (Figure 1D-F).

232 Raw data was notch filtered to remove line noise (zero-phase 2nd order Butterworth band-stop  
233 filters). Phase information was extracted from the down-sampled (200 Hz) and wide band-pass  
234 filtered data (2 – 30 Hz; zero-phase 8th order Butterworth band-pass filter) using the ‘generalized  
235 phase’ method (Davis et al., 2020) with a single-sided Fourier transform approach (Marple, 1999).  
236 This method captures the phase of the predominant fluctuations in the wideband signal and  
237 minimizes filter-related distortion of the waveform.

238 Inter-trial Phase Coherence (ITC) was calculated as the absolute vector length of the mean of unit  
239 vectors with the instantaneous phase of stimulus-aligned trials (Figure 1G,H). Phase locking value  
240 (PLV) was calculated identically to ITC but instead using phase difference between two electrodes.  
241 ITC and PLV were computed as the median value of 50 iterations of a random 60 trials. ITC and PLV  
242 were baselined -1,000 to -100 ms before each stimulus. PLV was calculated between pairs of  
243 electrodes in separate ROIs, within patient, within hemisphere. PLV statistics were performed using  
244 a bootstrapped null distribution, randomly re-pairing trials between electrodes, using 5,000  
245 repetitions. Phase probability distributions were quantified, using 30 equally spaced bins between -



246  $\pi$  and  $\pi$ , and mutual information (MI) was calculated based on these distributions at each time point,  
247 baselined -1,000 to -100ms before each stimulus. Asymmetry index (AI) was calculated based on the  
248 lagged PLV results at each time point as  $AI = \log_2(PLV_{pa}/PLV_{ap})$ , where  $PLV_{pa}$  represents the mean PLV  
249 between electrode  $p$  at time  $t$  and electrode  $a$  between time  $t$  and time  $t + 200$  ms.

250 Experimental Design and Statistical Analysis: Patients read single words ( $n = 40$  patients) or identified  
251 celebrity faces ( $n = 57$  patients). Stimuli were presented on a 2,880 x 1,800, 15.4" LCD screen  
252 positioned at eye-level, 2-3' from the patient. Additional details of each experiment are below:

253 *Word Reading:* Participants read aloud monosyllabic words (e.g. dream) and pseudowords (e.g.  
254 meech) presented in lower-case Arial font, 150 pixels high ( $\sim 2.2^\circ$  visual angle) (Figure 1A)  
255 (Woolnough et al., 2021a). Stimuli were presented using Psychophysics Toolbox (Kleiner et al.,  
256 2007) run in Matlab. Each stimulus was displayed for 1,500 ms with an inter-stimulus interval of  
257 2,000 ms. Stimuli were presented in two recording sessions, each with 160 stimuli in a  
258 pseudorandom order with no repeats.

259 *Face Recognition:* Participants were presented with greyscale photos of famous faces and asked to  
260 name them aloud (Figure 1B) (Kadipasaoglu et al., 2017; Woolnough et al., 2020). Stimuli were  
261 matched for luminance and contrast and presented, using Python 2.7, at a size of 500 x 500 pixels  
262 ( $\sim 7.5^\circ$  visual angle) for 2,000 ms, with an inter-stimulus interval of 6,000 ms. Stimuli were presented  
263 in one recording session, with 60-125 faces presented in pseudorandom order with no repeats.  
264 Participants who correctly identified less than 20 stimuli were excluded.

265 Linear regressions were performed using robust regression models (Matlab function *fitlm* using  
266 '*RobustOpts*'; iteratively reweighted least squares with bisquare weighting) (Welsch, 1977), to  
267 minimize the effect of outliers and to make fewer assumptions than traditional least squares linear  
268 regression models. To calculate onset latencies, we determined the first time point per electrode,  
269 within 600 ms of stimulus onset, where the first derivative of the ITC exceeded 3.5 standard  
270 deviations ( $\sim p < 0.001$ ) from baseline. We then used a regression model, predicting onset latency  
271 based on position in the  $y$  (anteroposterior) axis, derived from the surface-based co-registration. All  
272 temporal analyses were corrected for multiple comparisons using a Benjamini-Hochberg false-  
273 detection rate (FDR) threshold of  $q < 0.001$ .

274 **Acknowledgements**

275 We express our gratitude to all the patients who participated in this study; the neurologists at the  
276 Texas Comprehensive Epilepsy Program who participated in the care of these patients; and the  
277 nurses and technicians in the Epilepsy Monitoring Unit at Memorial Hermann Hospital who helped  
278 make this research possible. This work was supported by the National Institute for Deafness and  
279 other Communication Disorders DC014589 and National Institute of Neurological Disorders and  
280 Stroke NS098981.

281 **Author Contributions**

282 Conceptualization: OW, NT; Methodology: OW, NT; Data curation: OW, PSR, ZR; Software: OW;  
283 Formal Analysis and Visualization: OW; Writing – Original Draft: OW; Writing – Review and Editing:  
284 OW, KJF, NT; Funding Acquisition: NT; Neurosurgical Procedures: NT.

285 **Declaration of Interests**

286 The authors declare no competing interests

## 287 **References**

- 288 Alamia A, VanRullen R. 2019. Alpha oscillations and traveling waves: Signatures of predictive  
289 coding? *PLoS Biol* **17**. doi:10.1371/journal.pbio.3000487
- 290 Arnal LH, Giraud AL. 2012. Cortical oscillations and sensory predictions. *Trends Cogn Sci* **16**:390–  
291 398. doi:10.1016/j.tics.2012.05.003
- 292 Bahramisharif A, van Gerven MAJ, Aarnoutse EJ, Mercier MR, Schwartz TH, Foxe JJ, Ramsey NF,  
293 Jensen O. 2013. Propagating neocortical gamma bursts are coordinated by traveling alpha  
294 waves. *J Neurosci* **33**:18849–18854. doi:10.1523/JNEUROSCI.2455-13.2013
- 295 Bastos AM, Vezoli J, Bosman CA, Schoffelen JM, Oostenveld R, Dowdall JR, DeWeerd P, Kennedy H,  
296 Fries P. 2015. Visual areas exert feedforward and feedback influences through distinct  
297 frequency channels. *Neuron* **85**:390–401. doi:10.1016/j.neuron.2014.12.018
- 298 Bonnefond M, Jensen O. 2012. Alpha oscillations serve to protect working memory maintenance  
299 against anticipated distracters. *Curr Biol* **22**:1969–1974. doi:10.1016/j.cub.2012.08.029
- 300 Cox RW. 1996. AFNI: Software for Analysis and Visualization of Functional Magnetic Resonance  
301 Neuroimages. *Comput Biomed Res* **29**:162–173. doi:10.1006/cbmr.1996.0014
- 302 Dale AM, Fischl B, Sereno MI. 1999. Cortical Surface-Based Analysis: I. Segmentation and Surface  
303 Reconstruction. *Neuroimage* **9**:179–194. doi:10.1006/nimg.1998.0395
- 304 Davis Z, Muller L, Trujillo J-M, Sejnowski T, Reynolds J. 2020. Spontaneous Traveling Cortical Waves  
305 Gate Perception in Awake Behaving Primates. *Nature*. doi:10.1038/s41586-020-2802-y
- 306 Dugué L, Marque P, VanRullen R. 2015. Theta oscillations modulate attentional search performance  
307 periodically. *J Cogn Neurosci* **27**:945–958. doi:10.1162/jocn\_a\_00755
- 308 Felleman DJ, Van Essen DC. 1991. Distributed Hierarchical Processing in the Primate Cerebral  
309 Cortex. *Cereb Cortex* **1**:1–47. doi:10.1093/cercor/1.1.1
- 310 Ferraina S, Paré M, Wurtz RH. 2002. Comparison of cortico-cortical and cortico-collicular signals for  
311 the generation of saccadic eye movements. *J Neurophysiol* **87**:845–858.  
312 doi:10.1152/jn.00317.2001
- 313 Forseth KJ, Hickok G, Rollo PS, Tandon N. 2020. Language prediction mechanisms in human auditory  
314 cortex. *Nat Commun* **11**:5240. doi:10.1038/s41467-020-19010-6

- 315 Forseth KJ, Kadipasaoglu CM, Conner CR, Hickok G, Knight RT, Tandon N. 2018. A lexical semantic  
316 hub for heteromodal naming in middle fusiform gyrus. *Brain* **141**:2112–2126.  
317 doi:10.1093/brain/awy120
- 318 Garrido MI, Kilner JM, Kiebel SJ, Friston KJ. 2007. Evoked brain responses are generated by  
319 feedback loops. *Proc Natl Acad Sci U S A* **104**:20961–20966. doi:10.1073/pnas.0706274105
- 320 Ghuman AS, Brunet NM, Li Y, Konecky RO, Pyles JA, Walls SA, Destefino V, Wang W, Richardson RM.  
321 2014. Dynamic encoding of face information in the human fusiform gyrus. *Nat Commun*  
322 **5**:5672. doi:10.1038/ncomms6672
- 323 Goldenholz DM, Ahlfors SP, Hämäläinen MS, Sharon D, Ishitobi M, Vaina LM, Stufflebeam SM. 2009.  
324 Mapping the signal-to-noise-ratios of cortical sources in magnetoencephalography and  
325 electroencephalography. *Hum Brain Mapp* **30**:1077–1086. doi:10.1002/hbm.20571
- 326 Halgren M, Ulbert I, Bastuji H, Fabó D, Eross L, Rey M, Devinsky O, Doyle WK, Mak-McCully R,  
327 Halgren E, Wittner L, Chauvel P, Heit G, Eskandar E, Mandell A, Cash SS. 2019. The generation  
328 and propagation of the human alpha rhythm. *Proc Natl Acad Sci* **116**:23772–23782.  
329 doi:10.1073/pnas.1913092116
- 330 Hirshorn EA, Li Y, Ward MJ, Richardson RM, Fiez JA, Ghuman AS. 2016. Decoding and disrupting left  
331 midfusiform gyrus activity during word reading. *Proc Natl Acad Sci* **113**:8162–8167.  
332 doi:10.1073/pnas.1604126113
- 333 Howard MF, Poeppel D. 2012. The neuromagnetic response to spoken sentences: Co-modulation of  
334 theta band amplitude and phase. *Neuroimage* **60**:2118–2127.  
335 doi:10.1016/j.neuroimage.2012.02.028
- 336 Iemi L, Busch NA, Laudini A, Haegens S, Samaha J, Villringer A, Nikulin V V. 2019. Multiple  
337 mechanisms link prestimulus neural oscillations to sensory responses. *Elife* **8**:1–34.  
338 doi:10.1101/461558
- 339 Jutras MJ, Fries P, Buffalo EA. 2013. Oscillatory activity in the monkey hippocampus during visual  
340 exploration and memory formation. *Proc Natl Acad Sci* **110**:13144–13149.  
341 doi:10.1073/pnas.1302351110
- 342 Kadipasaoglu CM, Conner CR, Baboyan VG, Rollo M, Pieters TA, Tandon N. 2017. Network dynamics  
343 of human face perception. *PLoS One* **12**. doi:10.1371/journal.pone.0188834

- 344 Kadipasaoglu CM, Conner CR, Whaley ML, Baboyan VG, Tandon N. 2016. Category-selectivity in  
345 human visual cortex follows cortical topology: A grouped icEEG study. *PLoS One* **11**.  
346 doi:10.1371/journal.pone.0157109
- 347 Kleiner M, Brainard D, Pelli D. 2007. What's new in Psychtoolbox-3? *Perception* **36**.  
348 doi:10.1068/v070821
- 349 Klimesch W, Sauseng P, Hanslmayr S, Gruber W, Freunberger R. 2007. Event-related phase  
350 reorganization may explain evoked neural dynamics. *Neurosci Biobehav Rev* **31**:1003–1016.  
351 doi:10.1016/j.neubiorev.2007.03.005
- 352 Lakatos P, Karmos G, Mehta AD, Ulbert I, Schroeder CE. 2008. Entrainment of neuronal oscillations  
353 as a mechanism of attentional selection. *Science (80- )* **320**:110–113.  
354 doi:10.1126/science.1154735
- 355 Lakatos P, Shah AS, Knuth KH, Ulbert I, Karmos G, Schroeder CE. 2005. An oscillatory hierarchy  
356 controlling neuronal excitability and stimulus processing in the auditory cortex. *J Neurophysiol*  
357 **94**:1904–1911. doi:10.1152/jn.00263.2005
- 358 Lamme VAF, Roelfsema PR. 2000. The distinct modes of vision offered by feedforward and  
359 recurrent processing. *Trends Neurosci* **23**:571–579. doi:10.1016/S0166-2236(00)01657-X
- 360 Lozano-Soldevilla D, VanRullen R. 2019. The Hidden Spatial Dimension of Alpha: 10-Hz Perceptual  
361 Echoes Propagate as Periodic Traveling Waves in the Human Brain. *Cell Rep* **26**:374–380.  
362 doi:10.1016/j.celrep.2018.12.058
- 363 Luo H, Liu Z, Poeppel D. 2010. Auditory cortex tracks both auditory and visual stimulus dynamics  
364 using low-frequency neuronal phase modulation. *PLoS Biol* **8**:25–26.  
365 doi:10.1371/journal.pbio.1000445
- 366 Makeig S, Westerfield M, Jung TP, Enghoff S, Townsend J, Courchesne E, Sejnowski TJ. 2002.  
367 Dynamic brain sources of visual evoked responses. *Science (80- )* **295**:690–694.  
368 doi:10.1126/science.1066168
- 369 Marple SL. 1999. Computing the discrete-time “analytic” signal via FFT. *IEEE Trans Signal Process*  
370 **47**:2600–2603. doi:10.1109/acssc.1997.679118
- 371 Mercier MR, Molholm S, Fiebelkorn IC, Butler JS, Schwartz TH, Foxe JJ. 2015. Neuro-oscillatory  
372 phase alignment drives speeded multisensory response times: An electro-corticographic

- 373 investigation. *J Neurosci* **35**:8546–8557. doi:10.1523/JNEUROSCI.4527-14.2015
- 374 Mishkin M, Ungerleider LG, Macko KA. 1983. Object vision and spatial vision: two cortical pathways.  
375 *Trends Neurosci* **6**:414–417. doi:10.1016/0166-2236(83)90190-X
- 376 Morán MA, Mufson EJ, Mesulam M -M. 1987. Neural inputs into the temporopolar cortex of the  
377 rhesus monkey. *J Comp Neurol* **256**:88–103. doi:10.1002/cne.902560108
- 378 Mormann F, Fell J, Axmacher N, Weber B, Lehnertz K, Elger CE, Fernández G. 2005.  
379 Phase/amplitude reset and theta-gamma interaction in the human medial temporal lobe  
380 during a continuous word recognition memory task. *Hippocampus* **15**:890–900.  
381 doi:10.1002/hipo.20117
- 382 Muller L, Chavane F, Reynolds J, Sejnowski TJ. 2018. Cortical travelling waves: Mechanisms and  
383 computational principles. *Nat Rev Neurosci* **19**:255–268. doi:10.1038/nrn.2018.20
- 384 Muller L, Piantoni G, Koller D, Cash SS, Halgren E, Sejnowski TJ. 2016. Rotating waves during human  
385 sleep spindles organize global patterns of activity that repeat precisely through the night. *Elife*  
386 **5**. doi:10.7554/elife.17267
- 387 Muller L, Reynaud A, Chavane F, Destexhe A. 2014. The stimulus-evoked population response in  
388 visual cortex of awake monkey is a propagating wave. *Nat Commun* **5**.  
389 doi:10.1038/ncomms4675
- 390 Pieters TA, Conner CR, Tandon N. 2013. Recursive grid partitioning on a cortical surface model: an  
391 optimized technique for the localization of implanted subdural electrodes. *J Neurosurg*  
392 **118**:1086–1097. doi:10.3171/2013.2.JNS121450
- 393 Rizzuto DS, Madsen JR, Bromfield EB, Schulze-Bonhage A, Seelig D, Aschenbrenner-Scheibe R,  
394 Kahana MJ. 2003. Reset of human neocortical oscillations during a working memory task. *Proc*  
395 *Natl Acad Sci* **100**:7931–6. doi:10.1073/pnas.0732061100
- 396 Rollo PS, Rollo MJ, Zhu P, Woolnough O, Tandon N. 2020. Oblique trajectory angles in robotic  
397 stereo-electroencephalography. *J Neurosurg*. doi:10.3171/2020.5.JNS20975
- 398 Sato TK, Nauhaus I, Carandini M. 2012. Traveling Waves in Visual Cortex. *Neuron* **75**:218–229.  
399 doi:10.1016/j.neuron.2012.06.029
- 400 Sauseng P, Klimesch W, Gruber WR, Hanslmayr S, Freunberger R, Doppelmayr M. 2007. Are event-  
401 related potential components generated by phase resetting of brain oscillations? A critical

- 402 discussion. *Neuroscience* **146**:1435–1444. doi:10.1016/j.neuroscience.2007.03.014
- 403 Tandon N. 2012. Mapping of human language In: Yoshor D, Mizrahi E, editors. Clinical Brain  
404 Mapping. McGraw Hill Education. pp. 203–218.
- 405 Tandon N, Tong BA, Friedman ER, Johnson JA, Von Allmen G, Thomas MS, Hope OA, Kalamangalam  
406 GP, Slater JD, Thompson SA. 2019. Analysis of Morbidity and Outcomes Associated With Use of  
407 Subdural Grids vs Stereoelectroencephalography in Patients With Intractable Epilepsy. *JAMA*  
408 *Neurol* **76**:672–681. doi:10.1001/jamaneurol.2019.0098
- 409 Tang H, Buia C, Madhavan R, Crone NE, Madsen JR, Anderson WS, Kreiman G. 2014. Spatiotemporal  
410 Dynamics Underlying Object Completion in Human Ventral Visual Cortex. *Neuron* **83**:736–748.  
411 doi:10.1016/j.neuron.2014.06.017
- 412 Tesche CD, Karhu J. 2000. Theta oscillations index human hippocampal activation during a working  
413 memory task. *Proc Natl Acad Sci* **97**:919–924. doi:10.1073/pnas.97.2.919
- 414 Tong BA, Esquenazi Y, Johnson J, Zhu P, Tandon N. 2020. The Brain is Not Flat: Conformal Electrode  
415 Arrays Diminish Complications of Subdural Electrode Implantation, A Series of 117 Cases.  
416 *World Neurosurg* **144**:e734–e742. doi:10.1016/j.wneu.2020.09.063
- 417 Welsch RE. 1977. Robust regression using iteratively reweighted least-squares. *Commun Stat -*  
418 *Theory Methods* **6**:813–827. doi:10.1080/03610927708827533
- 419 Woolnough O, Donos C, Curtis A, Rollo PS, Roccaforte ZJ, Tandon N. 2021a. A Spatiotemporal Map  
420 of Reading Aloud. *bioRxiv*. doi:10.1101/2021.05.23.445307
- 421 Woolnough O, Donos C, Rollo PS, Forseth KJ, Lakretz Y, Crone NE, Fischer-Baum S, Dehaene S,  
422 Tandon N. 2021b. Spatiotemporal dynamics of orthographic and lexical processing in the  
423 ventral visual pathway. *Nat Hum Behav* **5**:389–398. doi:10.1038/s41562-020-00982-w
- 424 Woolnough O, Rollo PS, Forseth KJ, Kadipasaoglu CM, Ekstrom AD, Tandon N. 2020. Category  
425 Selectivity for Face and Scene Recognition in Human Medial Parietal Cortex. *Curr Biol* **30**:2707–  
426 2715. doi:10.1016/j.cub.2020.05.018
- 427 Yeung N, Bogacz R, Holroyd CB, Cohen JD. 2004. Detection of synchronized oscillations in the  
428 electroencephalogram: An evaluation of methods. *Psychophysiology* **41**:822–832.  
429 doi:10.1111/j.1469-8986.2004.00239.x
- 430 Zhang H, Watrous AJ, Patel A, Jacobs J. 2018. Theta and Alpha Oscillations Are Traveling Waves in

431 the Human Neocortex. *Neuron* **98**:1269–1281. doi:10.1016/j.neuron.2018.05.019

432



433 **Supplementary Figures**

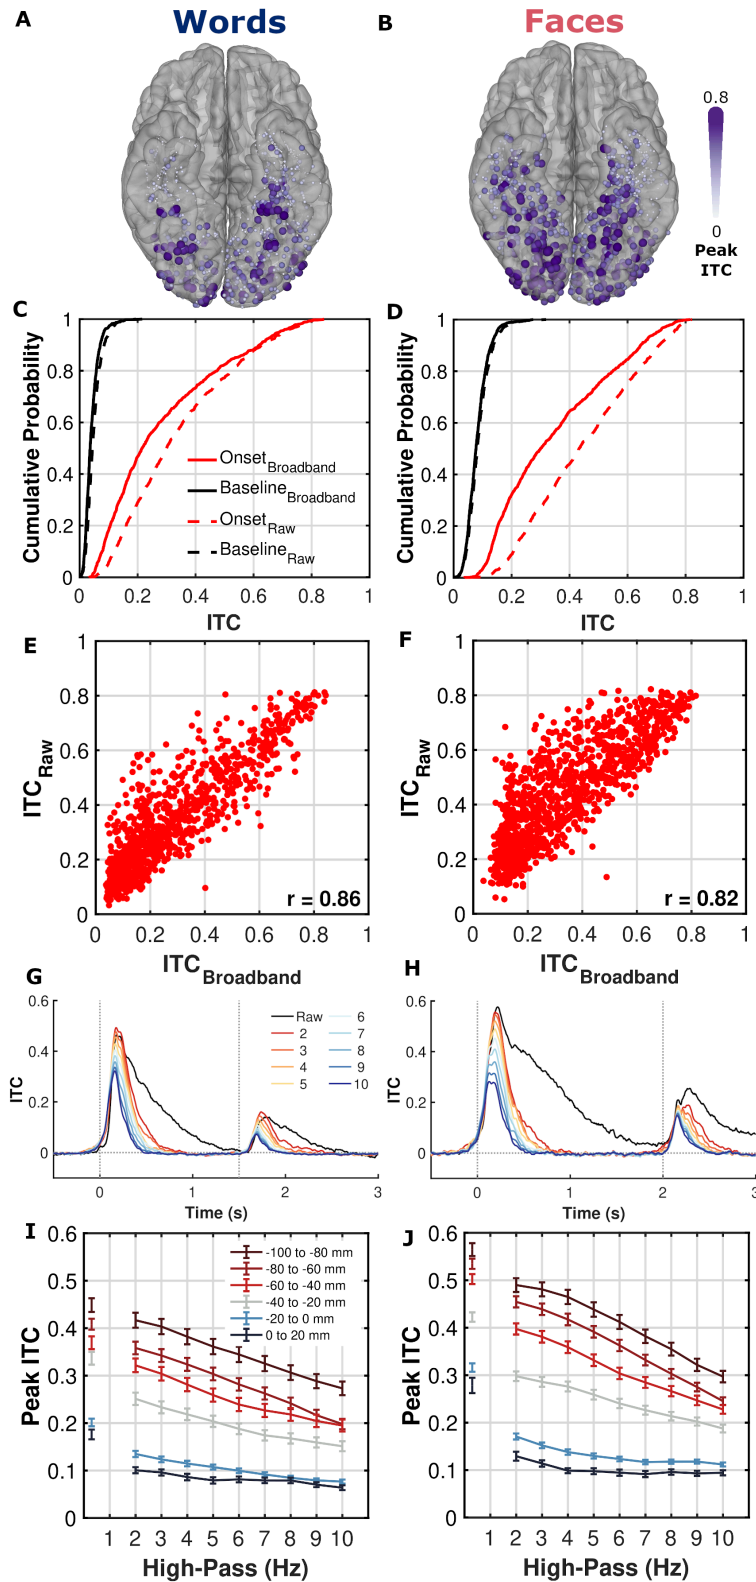

434

435 **Supplementary Figure 1: Comparison of Broadband Low Frequency and Raw Signal Analyses. (A,B)**

436 **Spatial distribution of peak ITC for each electrode in the raw (0.3 – 100 Hz) signal. (C,D) Cumulative**

437 **probability distribution of raw and broadband ITC. (E,F) Relationship of raw and broadband ITC.**

438 (G,H) Temporal ITC profile with varying high pass filter parameters. Same electrodes as Figure 3D,E.  
439 (I,J) Changes in peak ITC within each spatial ROI for the raw signal (0.3 Hz high pass) and varying  
440 high pass filtered signals (2 - 10Hz). Analyses shown for the words (A,C,E,G,I) and faces (B,D,F,H,J)  
441 tasks.  
442

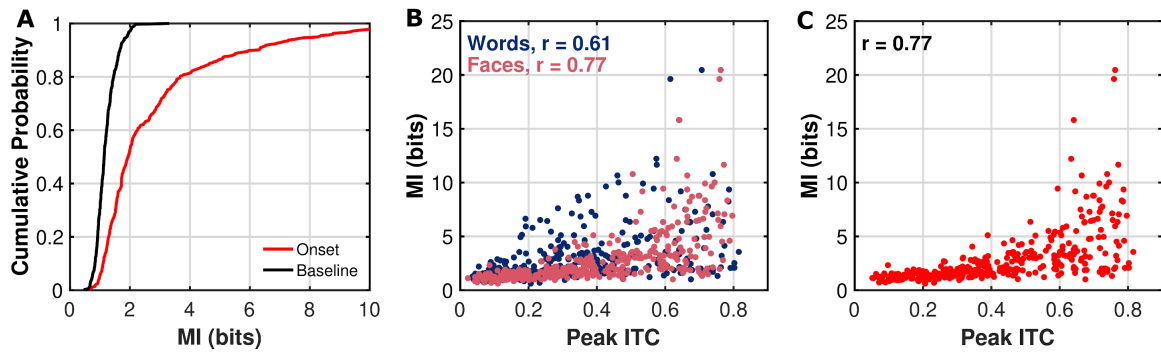

443  
444 **Supplementary Figure 2: Distribution of Mutual Information (MI).** (A) Cumulative distribution  
445 function of peak MI within the onset window (0 to 600 ms; red) or during the baseline window (-  
446 500 to -100 ms; black). (B,C) Relationship between peak MI and (B) peak ITC in the words and faces  
447 tasks or (C) peak ITC across both tasks, within individual electrodes.

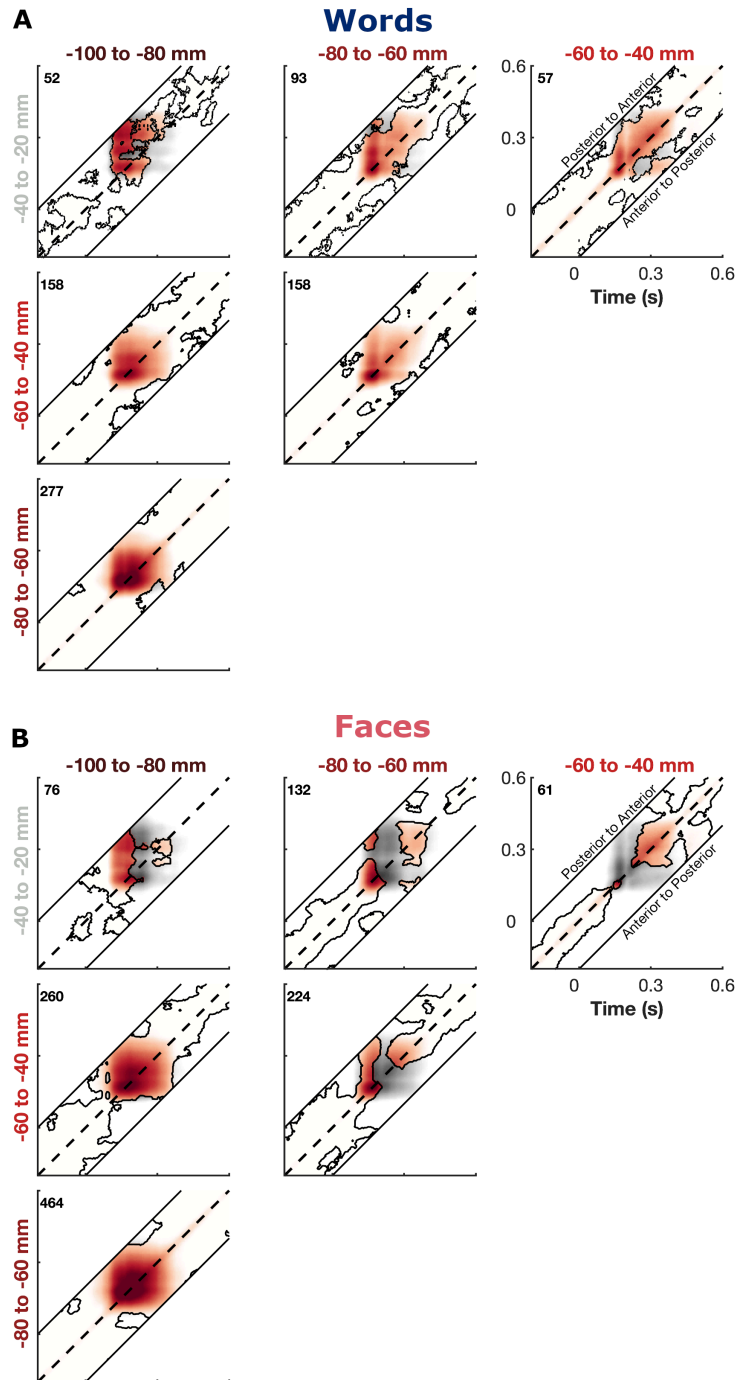

448

449 Supplementary Figure 3: **Lagged Phase Locking Value**. PLV was calculated between the  
450 instantaneous phase of the posterior electrodes (columns) and the time lagged phase of the  
451 anterior electrodes (rows; -200 to 200 ms) for the words (A) and faces (B) tasks. Greater PLV above  
452 the center diagonal (dashed line) represents a greater ability to predict future phase of the anterior  
453 electrodes based on the current phase of the posterior electrodes. Areas of significant PLV ( $q <$   
454 0.05) above a trial shuffled null distribution are indicated by contours and non-significant areas are  
455 desaturated. Number of electrode pairs in each ROI pair shown.
